# Supplementary material for: Early results of displaced femoral neck fragility fractures treated with supercapsular percutaneous-assisted total hip arthroplasty
Source: PubMed Central journal article supplement — Arthroplast Today. 2019 Mar 16;5(2):193–6. doi: 10.1016/j.artd.2019.02.003 (PMC6588679; doi:10.1016/j.artd.2019.02.003), 2019-03-16
Supplement: mmc3.pdf [file mmc3.pdf]

# INDIVIDUAL CONFLICT OF INTEREST STATEMENT

## *American Association of Hip and Knee Surgeons*

(Adopted from the American Academy of Orthopaedic Surgeons disclosure statement)

The following form **must be filled out completely and submitted by each author (example, 6 authors, 6 forms).**  
**All items require a response. If there is no relevant disclosure for a given item, enter "None."**

- Manuscript Title** *Early Results of Displaced Femoral Neck Fragility Fractures Treated with Supercapsular Percutaneously Assisted Total Hip Arthroplasty*
1. Royalties from a company or supplier (The following conflicts were disclosed)  
*None*
  2. Speakers bureau/paid presentations for a company or supplier (The following conflicts were disclosed)  
*None*
  - 3A. Paid employee for a company or supplier (The following conflicts were disclosed)  
*None*
  - 3B. Paid consultant for a company or supplier (The following conflicts were disclosed)  
*None*
  - 3C. Unpaid consultants for a company or supplier (The following conflicts were disclosed)  
*None*
  4. Stock or stock options in a company or supplier (The following conflicts were disclosed)  
*None*
  5. Research support from a company or supplier as a Principal Investigator (The following conflicts were disclosed)  
*None*
  6. Other financial or material support from a company or supplier (The following conflicts were disclosed)  
*None*
  7. Royalties, financial or material support from publishers (The following conflicts were disclosed)  
*None*
  8. Medical/Orthopaedic publications editorial/governing board (The following conflicts were disclosed)  
*None*
  9. Board member/committee appointments for a society (The following conflicts were disclosed)  
*None*

**Each author must sign AND print or type his/her name, date and submit a separate form**

In addition, one BLINDED Conflict of Interest form (no author names used) should be submitted per manuscript with all author disclosures.

*Ronald Jacob Mitchell*

Author Name (Print or Type)

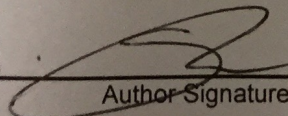

Author Signature

*19 April 2018*

Date
