# Supplementary material for: Early results of displaced femoral neck fragility fractures treated with supercapsular percutaneous-assisted total hip arthroplasty
Source: PubMed Central journal article supplement — Arthroplast Today. 2019 Mar 16;5(2):193–6. doi: 10.1016/j.artd.2019.02.003 (PMC6588679; doi:10.1016/j.artd.2019.02.003), 2019-03-16
Supplement: mmc4.pdf [file mmc4.pdf]

# INDIVIDUAL CONFLICT OF INTEREST STATEMENT

## *American Association of Hip and Knee Surgeons*

(Adopted from the American Academy of Orthopaedic Surgeons disclosure statement)

The following form **must be filled out completely and submitted by each author (example, 6 authors, 6 forms).** **All items require a response. If there is no relevant disclosure for a given item, enter "None."**

---

### Manuscript Title

1. Royalties from a company or supplier (The following conflicts were disclosed). MicroPort Orthopedics for patents
2. Speakers bureau/paid presentations for a company or supplier (The following conflicts were disclosed).  
None
- 3A. Paid employee for a company or supplier (The following conflicts were disclosed).  
None
- 3B. Paid consultant for a company or supplier (The following conflicts were disclosed). MicroPort Orthopedics for teaching.
- 3C. Unpaid consultants for a company or supplier (The following conflicts were disclosed)  
None
4. Stock or stock options in a company or supplier (The following conflicts were disclosed). Surgical Planning Associates, Inc.
5. Research support from a company or supplier as a Principal Investigator (The following conflicts were disclosed)  
None
6. Other financial or material support from a company or supplier (The following conflicts were disclosed)  
None
7. Royalties, financial or material support from publishers (The following conflicts were disclosed)  
None
8. Medical/Orthopaedic publications editorial/governing board (The following conflicts were disclosed)  
None
9. Board member/committee appointments for a society (The following conflicts were disclosed). International Society for Technology in Arthroplasty, Board Member

### **Each author must sign AND print or type his/her name, date and submit a separate form**

In addition, one BLINDED Conflict of Interest form (no author names used) should be submitted per manuscript with all author disclosures.

Stephen B. Murphy, MD

Author Name (Print or Type)

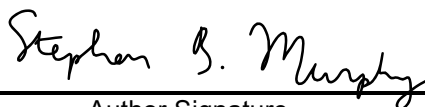

Author Signature

June 20, 2018

Date
