# Supplementary material for: Early results of displaced femoral neck fragility fractures treated with supercapsular percutaneous-assisted total hip arthroplasty
Source: PubMed Central journal article supplement — Arthroplast Today. 2019 Mar 16;5(2):193–6. doi: 10.1016/j.artd.2019.02.003 (PMC6588679; doi:10.1016/j.artd.2019.02.003), 2019-03-16
Supplement: mmc5.pdf [file mmc5.pdf]

# INDIVIDUAL CONFLICT OF INTEREST STATEMENT

## *American Association of Hip and Knee Surgeons*

(Adopted from the American Academy of Orthopaedic Surgeons disclosure statement)

The following form **must be filled out completely and submitted by each author (example, 6 authors, 6 forms).** **All items require a response. If there is no relevant disclosure for a given item, enter "None."**

**Manuscript Title:** Early Results of Displaced Femoral Neck Fragility Fractures Treated with Supercapsular Percutaneously Assisted Total Hip Arthroplasty

1. Royalties from a company or supplier (The following conflicts were disclosed)  
none

2. Speakers bureau/paid presentations for a company or supplier (The following conflicts were disclosed)  
none

3A. Paid employee for a company or supplier (The following conflicts were disclosed)  
none

3B. Paid consultant for a company or supplier (The following conflicts were disclosed)  
none

3C. Unpaid consultants for a company or supplier (The following conflicts were disclosed)  
none

4. Stock or stock options in a company or supplier (The following conflicts were disclosed)  
none

5. Research support from a company or supplier as a Principal Investigator (The following conflicts were disclosed)  
disclosed)  
none

6. Other financial or material support from a company or supplier (The following conflicts were disclosed)  
none

7. Royalties, financial or material support from publishers (The following conflicts were disclosed)  
none

8. Medical/Orthopaedic publications editorial/governing board (The following conflicts were disclosed)  
none

9. Board member/committee appointments for a society (The following conflicts were disclosed)  
none

**Each author must sign AND print or type his/her name, date and submit a separate form**

In addition, one BLINDED Conflict of Interest form (no author names used) should be submitted per manuscript with all author disclosures.

|                             |                                                                                   |         |
|-----------------------------|-----------------------------------------------------------------------------------|---------|
| Kevin Smith                 |  | 4/11/18 |
| Author Name (Print or Type) | Author Signature                                                                  | Date    |

Kevin Smith  
Smith

Kevin  
4/11/18
